# Supplementary material for: Changes in Body Weight in Severely Obese Patients Treated with the Anorexiant Mazindol
Source: MDPI journal article supplement (doi:10.3390/jcm13071860), 2024-03-23
Supplement: s1 [file s1]

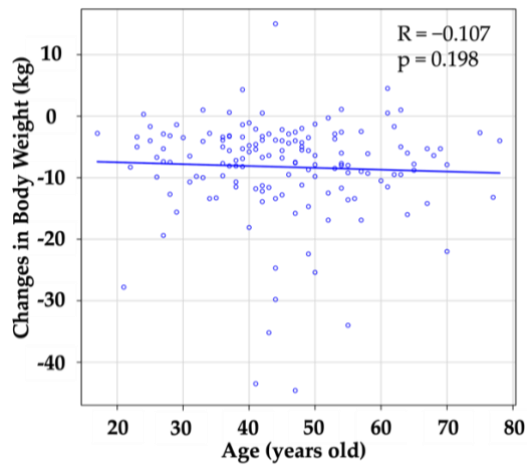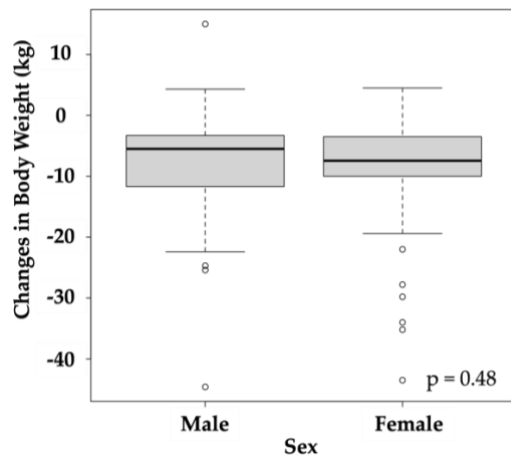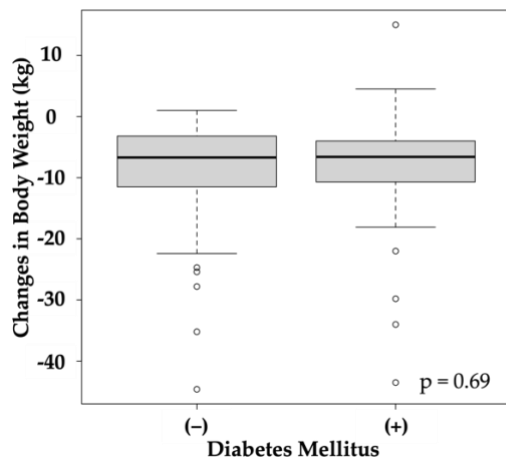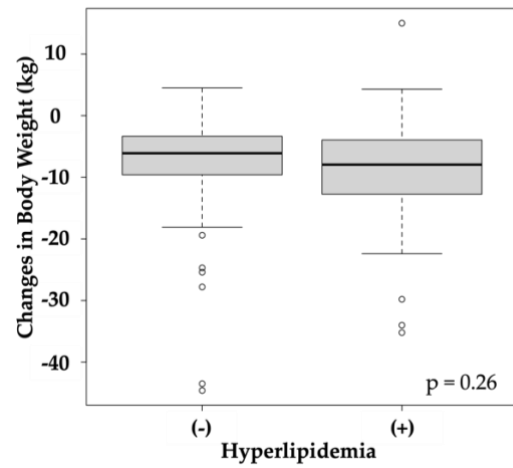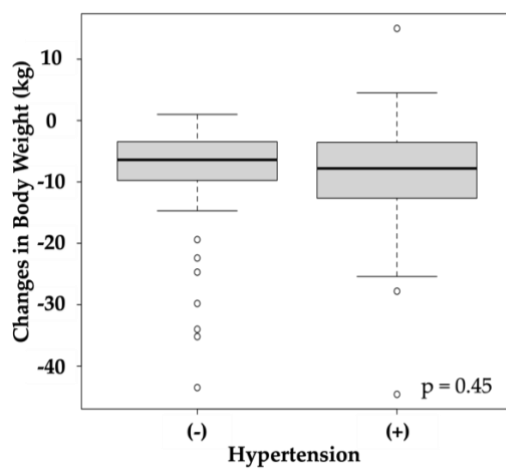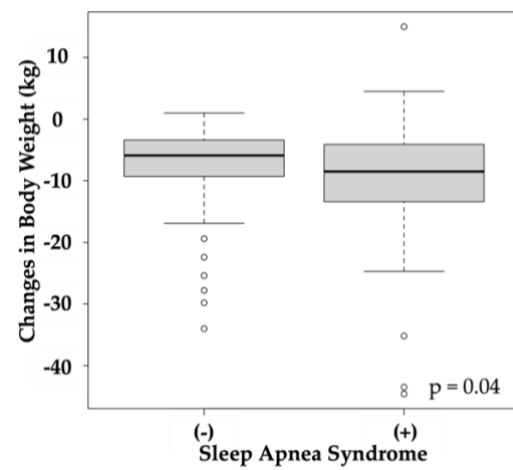

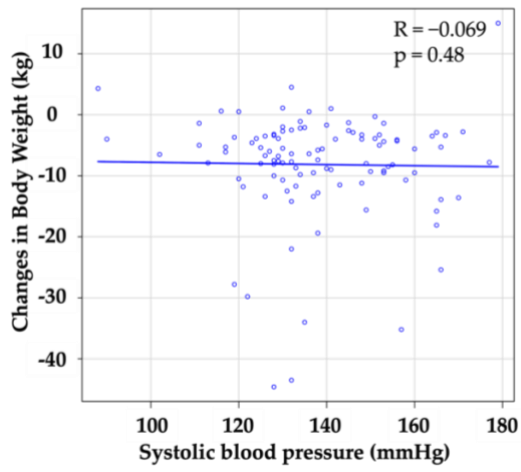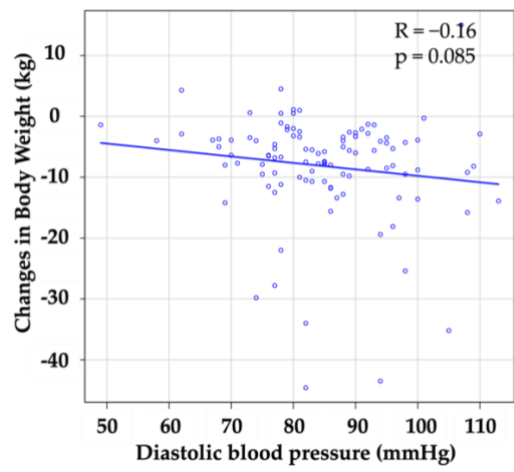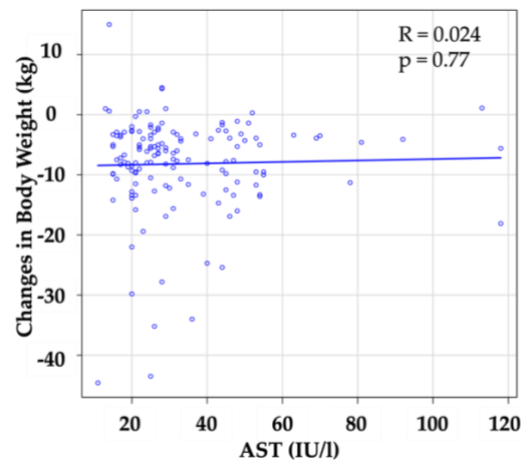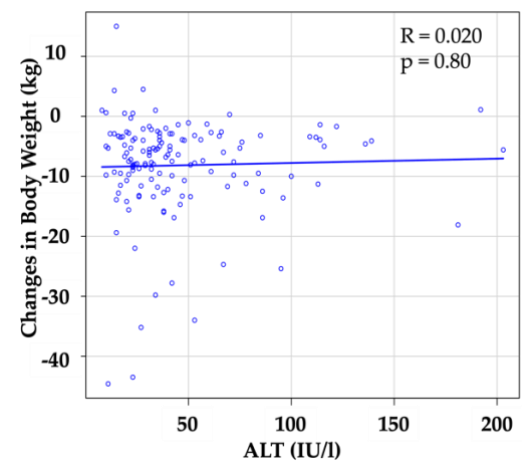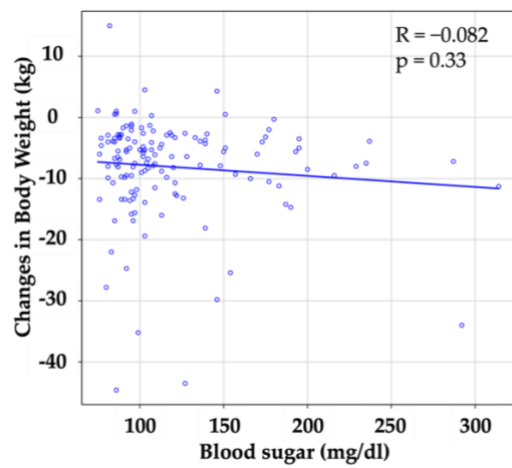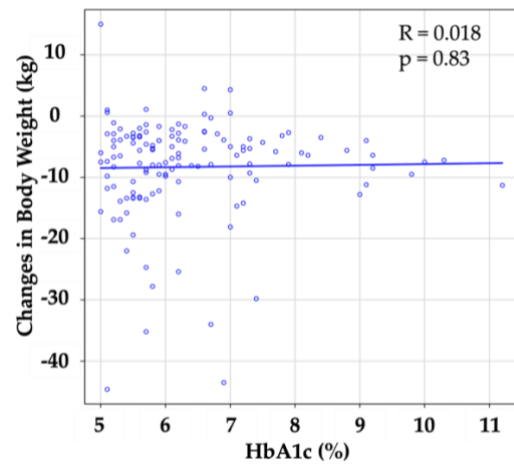

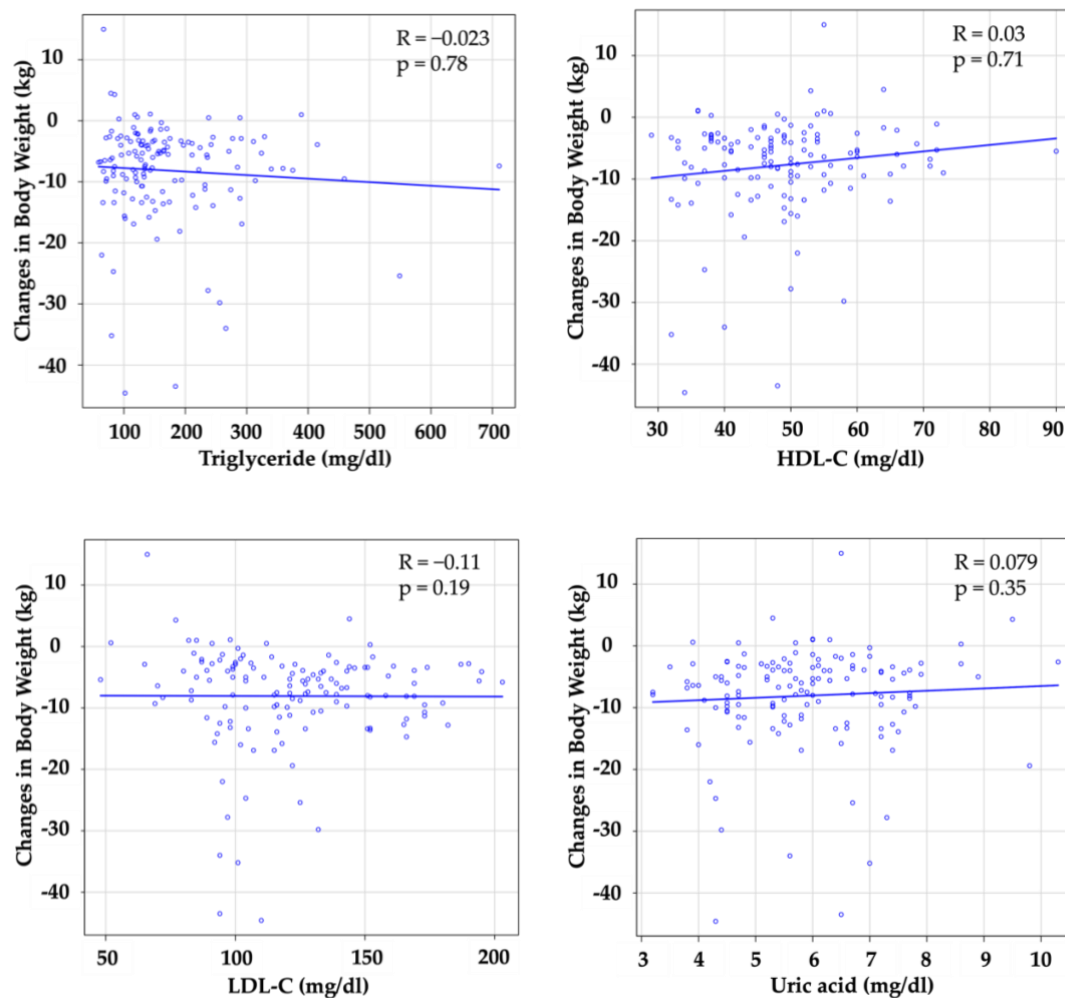

**Figure S1.** Relationships between the changes in body weight and comorbidities, laboratory factors, and medications.

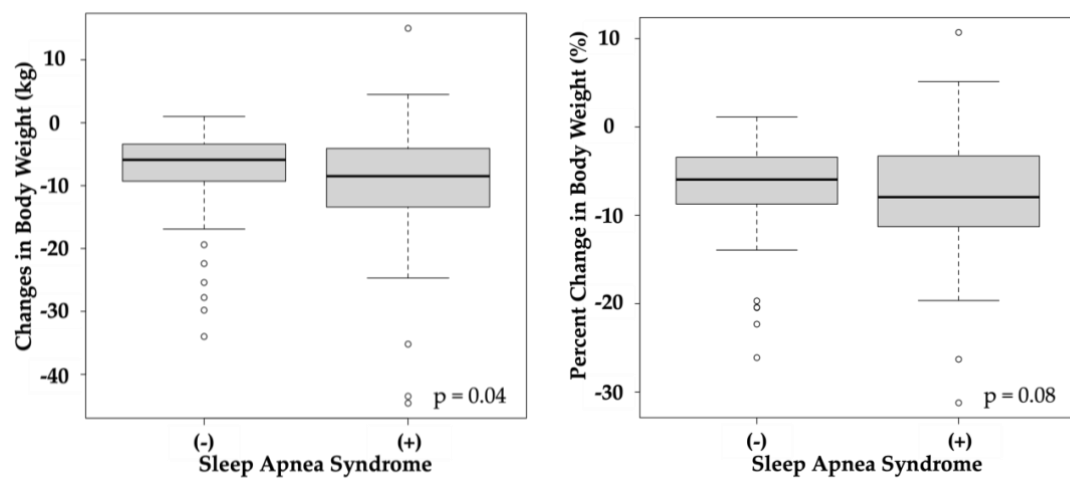

**Figure S2.** Effect of Sleep apnea syndrome on the changes in body weight (the left panel) and the proportions of the body weight changes (the right panel).
